# Supplementary material for: A model of HIV drug resistance driven by heterogeneities in host immunity and adherence patterns
Source: PubMed Central journal article supplement (PMC3643872; doi:10.1186/1752-0509-7-11), 2013-02-04
Supplement: 1752-0509-7-11-S1.pdf [file 1752-0509-7-11-S1.pdf]

## Supplementary Material for:

### A Model of HIV Drug Resistance Driven by Heterogeneities in Host Immunity and Adherence Patterns

Anna Bershteyn<sup>1</sup> and Philip A. Eckhoff<sup>1</sup>

<sup>1</sup>Epidemiological Modeling Group, Intellectual Ventures Laboratory

#### Supplementary Table 1. Sensitivity analysis of the virus dynamics model (without antiviral drugs).

Parameters of the model (left column) are systematically decreased by 10%, then increased by 10%. The percent change in the steady-state values for WT viral load ( $V_{ss,WT}$ ), WT-infected cell count ( $CD4_{ss,WT}$ ), K65R mutant viral load ( $V_{ss,mutant}$ ), and K65R mutant-infected cell count ( $CD4_{ss,mutant}$ ) are shown. Additionally, the percent change in the peak viral load value during the acute phase, and of the time of this peak, are shown. Steady-state values are the most sensitive to changes in  $k$ ,  $\lambda$ , and  $u$ , while acute phase dynamics are most sensitive to changes in  $\beta$ ,  $k$ , and  $u$ . Parameter values are set as in Figure 1/Table 1, with  $p = 1.5 \times 10^{-5}$ .

|                             | Fold change in value after this parameter increases/decreases by 10% |      |               |     |                 |      |                   |     |                |      |           |         |
|-----------------------------|----------------------------------------------------------------------|------|---------------|-----|-----------------|------|-------------------|-----|----------------|------|-----------|---------|
|                             | $V_{ss,WT}$                                                          |      | $CD4_{ss,WT}$ |     | $V_{ss,mutant}$ |      | $CD4_{ss,mutant}$ |     | Acute peak $v$ |      | Peak time |         |
|                             | -                                                                    | +    | -             | +   | -               | +    | -                 | +   | -              | +    | -         | +       |
| <b><math>\beta</math></b>   | -4%                                                                  | 3%   | -4%           | 3%  | -4%             | 3%   | -4%               | 3%  | -5%            | 3%   | 9%        | -7%     |
| <b><math>k</math></b>       | -14%                                                                 | 14%  | -4%           | 3%  | -14%            | 14%  | -4%               | 3%  | -14%           | 14%  | 8%        | -7%     |
| <b><math>p</math></b>       | 8%                                                                   | -7%  | 8%            | -7% | 8%              | -7%  | 8%                | -7% | 1%             | -1%  | -0.2%     | 0.1%    |
| <b><math>b</math></b>       | -8%                                                                  | 7%   | -8%           | 7%  | -8%             | 7%   | -8%               | 7%  | -0.2%          | 0.2% | -0.003%   | -0.003% |
| <b><math>c_1</math></b>     | 8%                                                                   | -7%  | 8%            | -7% | 8%              | -7%  | 8%                | -7% | 1%             | -1%  | -0.2%     | 0.1%    |
| <b><math>\lambda</math></b> | -14%                                                                 | 14%  | -14%          | 14% | -14%            | 14%  | -14%              | 14% | -10%           | 10%  | 3%        | -3%     |
| <b><math>d</math></b>       | 4%                                                                   | -4%  | 4%            | -4% | 4%              | -4%  | 4%                | -4% | 9%             | -9%  | -3%       | 3%      |
| <b><math>u</math></b>       | 15%                                                                  | -12% | 4%            | -4% | 15%             | -12% | 4%                | -4% | 13%            | -12% | -5%       | 6%      |
| <b><math>a</math></b>       | 7%                                                                   | -6%  | 7%            | -6% | 7%              | -6%  | 7%                | -6% | 5%             | -5%  | -1%       | 1%      |

**Supplementary Table 2. Sensitivity of resistance and reversion times to model parameters.** The time of emergence of drug resistance is sensitive to the infection rate, viral production rate, and viral clearance rate ( $\beta$ ,  $k$ , and  $u$ ), as well as  $f$ , which combines changes in  $\beta$  and  $k$  such that steady-state viral load remains constant. It is also sensitive to the production and clearance of target cells ( $\lambda$  and  $d$ ), clearance of infected cells ( $a$ ), and the production, clearance, and killing power of immune cells ( $b$ ,  $c_1$ , and  $p$ ). Parameter values are set as in Figure 2/Table 1, with  $p = 1.5 \times 10^{-5}$ .

| Parameter                 | Fold change in <b>resistance</b> time when param |                         | Fold change in <b>reversion</b> time when param |                         |
|---------------------------|--------------------------------------------------|-------------------------|-------------------------------------------------|-------------------------|
|                           | <u>Decreases by 10%</u>                          | <u>Increases by 10%</u> | <u>Decreases by 10%</u>                         | <u>Increases by 10%</u> |
| $\beta$                   | 51%                                              | -24%                    | -7%                                             | 5%                      |
| $k$                       | 122%                                             | -34%                    | -14%                                            | 8%                      |
| $p$                       | -20%                                             | 33%                     | 8%                                              | -8%                     |
| $b$                       | 38%                                              | -19%                    | -9%                                             | 8%                      |
| $c_1$                     | -20%                                             | 33%                     | 8%                                              | -8%                     |
| $\lambda$                 | 47%                                              | -22%                    | -9%                                             | 6%                      |
| $d$                       | -19%                                             | 34%                     | 5%                                              | -6%                     |
| $u$                       | -26%                                             | 44%                     | 6%                                              | -7%                     |
| $a$                       | -19%                                             | 29%                     | 7%                                              | -7%                     |
| $g$                       | -0.1%                                            | 0.1%                    | 0.000%                                          | 0.000%                  |
| $h$                       | 0.1%                                             | -0.1%                   | 0.8%                                            | -0.5%                   |
| $f$                       | -18%                                             | 26%                     | 4%                                              | -4%                     |
| $K_a$                     | -1%                                              | 0.8%                    | -0.1%                                           | 0.1%                    |
| $K_e$                     | 2%                                               | -2%                     | 0.3%                                            | -0.3%                   |
| $K_{1f}$                  | -4%                                              | 3%                      | -0.4%                                           | 0.4%                    |
| $K_{1b}$                  | 3%                                               | -2%                     | 0.4%                                            | -0.3%                   |
| $K_{2f}$                  | -3%                                              | 3%                      | -0.4%                                           | 0.4%                    |
| $K_{2b}$                  | 3%                                               | -3%                     | 0.4%                                            | -0.3%                   |
| $K_m$                     | 0.003%                                           | 0.002%                  | 0.1%                                            | 0.1%                    |
| $K_c$                     | 2%                                               | -2%                     | 3%                                              | -2%                     |
| $H$                       | -4%                                              | 4%                      | -0.5%                                           | 0.4%                    |
| $f_{\text{plasma-bound}}$ | 0.2%                                             | -0.3%                   | 0.1%                                            | -0.02%                  |
| $IC_{50,WT}$              | 0.4%                                             | -0.7%                   | 4%                                              | -4%                     |
| $IC_{50,mut}$             | 9%                                               | -6%                     | -2%                                             | 1%                      |
| $m_{WT}$                  | -2%                                              | 0.6%                    | -6%                                             | 4%                      |
| $m_{mut}$                 | -7%                                              | 8%                      | 1%                                              | -2%                     |
